# Supplementary material for: Thermodynamically stable whilst kinetically labile coordination bonds lead to strong and tough self-healing polymers
Source: PubMed Central journal article supplement (PMC6411951; doi:10.1038/s41467-019-09130-z), 2019-03-11
Supplement: 41467_2019_9130_MOESM3_ESM.pdf [file 41467_2019_9130_MOESM3_ESM.pdf]

## **Description of Additional Supplementary Files**

File Name: Supplementary Movie 1

Description: The comparison of composite sponge and blank sponge when deforming and recovering.
